1 **Divergent epigenetic profiles from two differentially impacted wild populations**  
2 **of estuarine cordgrass (*Sporobolus alterniflorus*)**  
3

4 DeCarlo, L.,<sup>1</sup> Meckler, F.,<sup>1</sup> Hans, M.,<sup>1</sup> Kelemen, S.,<sup>1</sup> Magun, H.,<sup>1</sup> Noah, M.,<sup>1</sup> Pappajohn, L.,<sup>1</sup>  
5 Anderson, N.,<sup>1</sup> Berger, R.,<sup>1</sup> Berkel, J.,<sup>1</sup> Brooke, N.,<sup>1</sup> Chen, L.,<sup>1</sup> Chijioke, O.,<sup>1</sup> Dewees, N.,<sup>1</sup>  
6 Falkner P.,<sup>1</sup> Frank, J.,<sup>1</sup> Holzman, W.,<sup>1</sup> Marino, V.,<sup>1</sup> Ravaschiere, A.,<sup>1</sup> Wang, Y.,<sup>1</sup> Williams, A.,<sup>1</sup>  
7 Williams, Z.,<sup>1</sup> Gentile, D.,<sup>2</sup> and Cox, R.L.<sup>1,3\*</sup>

8  
9 <sup>1</sup>Lisman Laboratories for Molecular Ecology, Riverdale Country School, Bronx, NY, USA

10  
11 <sup>2</sup>Berkeley Carroll School, Brooklyn, NY, USA

12  
13 <sup>3</sup>Department of Ecology, Evolution, and Environmental Biology, Columbia University,  
14 New York, NY, USA

15  
16 Authors declarations of competing interests: none

17  
18 \*Corresponding author.

19 *E-mail address:* [rcox@riverdale.edu](mailto:rcox@riverdale.edu) (RL Cox).

20  
21 **Acknowledgements**

22 We thank Riverdale Country School, Dominic Randolph and Kelley Nicholson-Flynn for  
23 continued support of the Lisman Laboratories. We acknowledge Zachery Halem for his help with  
24 planning discussions and analyses. We are grateful to Julia Gardner who assisted with literature  
25 searches, and to Travis Brady, Emma Dietz, Juliette Egan, Jacob Katz, Eli Sands, Shae Simpson,  
26 and Knut Vanderbush for their invaluable assistance in the laboratory. We thank Melissa Lee and  
27 the Harlem DNA Center for donating PCR primers and advice. We thank Dan Luciano who  
28 generously shared equipment and expertise.

29  
30 **Author Contributions**

31 All authors made critical contributions to this study, reviewed drafts, and agree on all aspects of  
32 the work. In particular, MH, SK, ND, HM and RLC conceived of, and initiated the heat shock  
33 study. LD, FM, MH, SK, HM, MN, NA, RB, NB, JB, LC, RC, ND, PF, BF, WH, LP, AR, YW,  
34 AW, ZW, and RLC designed and executed heat shock experiments. LD, FM, RLC and DG  
35 performed final analyses of heat shock data. LD, FM, RLC, MN, JB, LC, OC, RC, BF, DG, WH,  
36 VM, LP and WW designed and executed methylation studies. LD, FM, MN, JB, LC, OC, RC,  
37 BF, DG, WH, VM, FM, LP and RLC analyzed methylation data. LD, LC, OC, JF, DG, WH, VM  
38 and WW designed and executed barcoding experiments. LD, OC, DG analyzed barcoding data.  
39 LD, FM, LP, DG and RLC wrote the manuscript. MN reviewed the manuscript for important  
40 intellectual content.

41  
42 **Keywords:** % 5-mC; DNA methylation; ecosystem provider; epigenetic modification; heat  
43 shock protein 70 (HSP70); marsh grass; *Sporobolus alterniflorus*; stress tolerance; urban estuary;  
44 wild populations

45 **Highlights for manuscript submission:**

- 46     ▪ estuarine grasses native to the Bronx River, NY face stresses associated with low  
47       dissolved oxygen and urbanization
- 48     ▪ differentially impacted populations of estuarine grasses exhibit inverse global DNA  
49       methylation profiles in response to acute heat stress
- 50     ▪ DNA methylation may represent a mechanism by which plants transiently respond to  
51       environmental stressors, and this may represent a form of rapid adaptive evolution
- 52     ▪ stress priming by transgenerational epigenetic modification may enhance fitness in  
53       grasses native to the heavily impacted Bronx River estuary

54

55 **Abstract**

56       The effects of urbanization on watershed ecosystems present critical challenges to  
57       modern survival. Organisms in urbanized areas experience high rates of evolutionary change, but  
58       genetic adaptation alone cannot mitigate the rapid and severe effects of urbanization on  
59       biodiversity. Highly resilient, foundation species are key to maintaining an ecosystem's integrity  
60       in the face of urban stressors. However, the rapid collapse and disappearance of watershed  
61       ecosystems calls into question the extent to which we can rely on such species for their services.  
62       Our research investigates the molecular mechanisms by which the foundation ecosystems  
63       provider, *Sporobolus alterniflorus*, adapts to life in an urbanized environment. To elucidate these  
64       mechanisms, we quantified changes in global DNA methylation (% 5-mC) as a result of acute  
65       heat stress. Specimens from two differentially impacted populations across an urban to suburban  
66       geographical transect formed the basis of this study. These two populations of *Sporobolus*  
67       *alterniflora* exhibit inverse global DNA methylation patterns when exposed to the same acute  
68       heat stress. Our findings suggest that epigenetic mechanisms, such as DNA methylation, control  
69       rapid and transient adaptation, in the form of differential stress responses, to distinct environment  
70       challenges.

71

72 **1- Introduction**

73       Urban estuaries are highly productive ecosystems that provide critical services including  
74       storm surge protection, water filtration and wildlife habitat (Barbier et al., 2011; Franca et al.,  
75       2012). Coastal salt marshes comprise approximately 25% of the global soil carbon sink through

76 plant production and high carbon burial rates (Chmura et al., 2003). Human activity,  
77 industrialization, and climate change continue to negatively impact estuarine ecosystems,  
78 especially in urbanized areas (Limburg et al., 2005; Astaraié-Imani et al., 2012; Chin et al.,  
79 2013). Estuarine species face stresses associated with adverse environmental conditions such as  
80 low dissolved oxygen, combined sewage overflow, toxin contamination, bank destabilization,  
81 habitat degradation, and extreme temperature fluctuation (Van Dolah, et al., 2008; Courrat et al.,  
82 2009; Halem et al., 2014; Ravaschiere et al., 2017). Knowledge of the molecular mechanisms  
83 underlying stress adaptation is essential if we hope to rehabilitate estuarine ecosystems adversely  
84 affected by urbanization.

85 Urbanization is often associated with rapidly changing anthropogenic stressors (Alberti,  
86 2015; Donihue and Lambert, 2015). As sessile organisms, plants must respond to these  
87 environmental challenges by rapidly regulating gene expression, and this is often accomplished  
88 via epigenetic alterations such as DNA methylation and histone modification (Arikan et al.,  
89 2018; Wang et al., 2010). These transient and rapid modifications provide essential “on demand”  
90 phenotypic variation (Rey et al., 2016), that may represent critical adaptive mechanisms for  
91 species such as marsh grasses that provide essential ecological services to urban communities.

92 Here, we take an *in vivo* approach to the study of epigenetic adaptation in wild  
93 populations of smooth cordgrass *Sporobolus alterniflorus* (formerly *Spartina alterniflora*), a  
94 critical ecosystems provider and foundation species that is native to estuaries throughout the  
95 North American east coast (Gedan and Bertness, 2010; Peterson, 2014). This halophyte species  
96 is particularly resilient in the face of urbanization (Gedan and Bertness, 2010) and thus  
97 represents a particularly suitable model for our study. In research findings presented here, we  
98 track two robust mechanisms for transient stress response in plants: genomic DNA cytosine  
99 methylation (% 5-mC) and heat shock protein 70 expression (HSP70). The methylation of 5-  
100 cytosine (% 5-mC) occurs when a methyl group is enzymatically attached to the 5' carbon of  
101 cytosine's pyrimidine ring, resulting in a decrease in gene expression at the methylation site.  
102 This reversible chemical modification elicits transient phenotypic changes required for stress  
103 response, especially in plants (Meyer, 2008; Boyko and Kovalchuk, 2011; Arikan et al., 2018).  
104 HSP70 chaperone protein is a well-characterized and universal stress responder that facilitates  
105 refolding of denatured proteins, and thus restoration of vital metabolic activities (Walter and  
106 Ron, 2011).

107 We compared global DNA methylation (% 5-mC) in response to acute heat stress in two  
108 differentially impacted wild populations: the Bronx River estuary, New York and the Greenwich  
109 Cove estuary, Connecticut, using HSP70 as an indicator of acute stress response. These estuaries  
110 are located about 25 miles from each other and share similar biota. However, their diametric  
111 histories make these estuaries uniquely suited for a comparative analysis of urban stress  
112 response. The Bronx River estuary has a history of factory waste and sewage dumping  
113 (Crimmens and Larson, 2006). Construction of the Bronx River Parkway led to degradation of  
114 water quality and a decrease in species diversity (Rachlin, 2007). Ongoing industrialization  
115 eventually led to benzo-a pyrene (Litten et al., 2007) and sewage contamination (Rachlin, 2007;  
116 Wang and Pant, 2010) of the Bronx River estuary. Whereas, the suburban Greenwich Cove  
117 estuary lies at a greater geographic distance from urbanized centers and thus experiences  
118 comparatively less impact from urbanization and industrialization (Halem et al., 2014;  
119 Ravaschiere et al., 2017). Previous studies of the Bronx River estuary document endocrine  
120 disruption (Halem et al., 2014) and altered heat shock response (Ravaschiere et al., 2017) in the  
121 native ecosystem provider (Galimay et. al., 2017) Atlantic ribbed mussel (*Geukensia demissa*).  
122 In addition, our nine-year longitudinal study, demonstrates that dissolved oxygen (DO)  
123 concentrations in the Bronx River estuary remain consistently lower than those recorded from  
124 the Greenwich Cove estuary (Table 1). This is likely a result of ongoing urbanization proximal to  
125 the Bronx River estuary (Slattery, 2018). Consistent and long-lasting differences in dissolved  
126 oxygen levels from these two estuaries lend quantitative support to our claim that salt marsh  
127 grasses native to the Bronx River estuary are coping with challenges that rarely arise for their  
128 Greenwich Cove conspecifics.

129 Ultimately, the health of urban wetlands will depend on phenotypic adaptation of native  
130 species to the pressures introduced by anthropogenic processes (Alberti, 2015). Results of this  
131 study provide insight into the molecular mechanisms deployed by a dominant and foundational  
132 ecosystem provider that is facing consistent and long-term environmental challenge. Our results  
133 will help to inform future conservation and management decisions regarding critical urban plant  
134 species that must persist regardless of increasing urbanization and environmental degradation.

135

## 136 **2- Materials and Methods**

137

138 *2.1 Water Collection and analyses*

139 Concentrations of dissolved oxygen (DO) were obtained using the Winkler titration method.  
140 Oxygen was fixed on site using manganous sulfate, alkaline potassium iodide azide, and  
141 sulfamic acid. Sodium thio- sulfate was used to titrate the water sample with starch indicator to a  
142 clear endpoint.

143

144 *2.2 Collection of plant material and heat shock*

145 *Sporobolus alterniflorus* (formerly *Spartina alterniflora*) plants were removed from their native  
146 environments in Harding Lagoon near Soundview Park, Bronx River estuary, NY (40°48'35.6"N,  
147 73°34'18.0"W), and at Todd's Point estuary in Greenwich Cove, CT (41°0' 30.8088"N,  
148 73°34'14.1709"W). Plants were taken along with their roots, soil, and native water at low tide.  
149 Plants were transported to the laboratory, where each plant was transplanted into native soil in a  
150 separate plastic cup with holes punched in the sides and base to allow for adequate aeration. All  
151 plants were equilibrated at approximately 23°C in a large basin of native water with aeration, for  
152 at least 24 hours. For the initial heat shock, four individual plants from each were incubated in a  
153 stand-up incubator at 42 ± 2°C for 30 minutes in pre-heated native water, and the incubator was  
154 left dark. Water was not aerated during treatment. Concurrently, four individual plants from each  
155 site (8 total plants), were incubated in their respective water at room temperature (21 ± 1°C) for  
156 30 minutes in the dark without aeration to serve as controls. After treatments, all plants were  
157 moved to room temperature (both air and native water), ambient light, with no aeration to rest for  
158 30 minutes. After resting, plants underwent a second treatment, heat shock or control, as  
159 described above. Post second treatment, all plants were moved to room temperature air and  
160 native water and allowed to rest overnight in ambient light with aeration. Grass samples were  
161 collected over multiple years, at the same time of year, and on the same tides, and as such  
162 represent appropriate biological replicates.

163

164 *2.3 DNA extraction*

165 DNA was isolated using the Qiagen DNeasy Plant Mini Kit (Qiagen, #69104). Leaves were cut  
166 with clean dissecting scissors from near the stem of each individual plant and wiped clean of any  
167 dirt or debris. Plant matter (0.5 g) was taken for each treatment from each of four plants. Plant  
168 matter was pooled and cut into small pieces with clean dissecting scissors and crushed with a

169 mortar and pestle and 400  $\mu$ L AP1 (lysis buffer) + and 4  $\mu$ L RNase. All contents were transferred  
170 to a micro centrifuge tube. Pipetting up and down further agitated samples. Samples were  
171 vortexed and incubated in a heat block at 65°C for 10 minutes, vortexing 2-3 times during  
172 incubation. The remaining steps were performed according to the Qiagen DNeasy Plant Mini  
173 Kit. DNA concentrations and quality were assessed using Nano Drop Microvolume  
174 Spectrophotometer (ThermoFisher Scientific). DNA samples were stored at -20°C in AE buffer  
175 from Qiagen DNeasy Plant Mini Kit.

176

#### 177 *2.4 Global DNA methylation analysis*

178 Global genomic methylation levels were determined using 100 ng of DNA for each sample using  
179 the MethylFlash Methylated DNA Quantification Kit Colorimetric (Epigentek, #P-1034). The  
180 absolute methylation level was determined using a standard curve. The percentage of globally  
181 methylated DNA was calculated using absolute quantification from the Epigentek Protocol.

182

#### 183 *2.5 Protein extraction and concentration determination*

184 Leaves were cut with clean dissecting scissors from near the stem of each individual plant and  
185 wiped clean of any dirt or debris. Plant tissue (500 mg) was pooled from four individuals from  
186 each site/condition. Tissue was immediately placed into lysis bags provided in the P-PER Plant  
187 Protein Extraction Kit (Thermo Scientific, #89803, Rockford, IL) and lysed according to  
188 provided instructions with the following modification: the volume of working solution was  
189 reduced to half of the recommended volume per sample. Protein solutions were stored at -20 °C  
190 for no longer than 4 weeks. Concentrations of proteins in plant leaves were determined according  
191 to the Pierce BCA Protein Assay Kit-Reducing Agent Compatible (Thermo Scientific, #23250,  
192 Rockford, IL).

193

#### 194 *2.6 Quantification of heat shock protein*

195 Specific heat shock protein (HSP70) protein levels were quantified by Western blot (SDS-  
196 PAGE) analysis. Plant leaf protein samples (30-100  $\mu$ g) were run on a 10% Mini-PROTEAN®  
197 TGX™ Precast Protein Gel (Bio-Rad) and transferred to PVDF membranes, Ponceau stained to  
198 visualize protein transfer and evenly loaded across samples. Membranes were blocked for 1 hour  
199 at room temperature overnight at 4 °C in Superblock (Thermo-scientific, #37535, Rockford, IL).

200 After blocking, blots were incubated in mouse HSP70 monoclonal antibody (1:1000, Enzo,  
201 #AZI-SPA-820, Plymouth Meeting, PA). After washing 3x 10min in TBS + Tween20,  
202 membranes were incubated in goat anti-mouse secondary antibody (1:10,000, Thermo-scientific,  
203 #31430, Rockford, IL) for 1 hour at room temperature. Membranes were washed 3 x 10min in  
204 TBS + Tween 20 before proteins were detected by Immuno-Star luminol-peroxide (Bio-Rad,  
205 #170-5070). Bio-Rad Chemi-doc was used to visualize and quantify proteins with densitometry.  
206

### 207 *2.7 DNA barcoding*

208 DNA isolated from 12 organisms from each site (described above) was used to PCR amplify the  
209 universal plant gene *rbcL* using the following primers:

210 *rbcLa*F 5'- TGTAACGACGGCCAGTATGTCACCACAAACAGAGACTAAAGC-3'

211 *rbcLa* rev 5' CAGGAAACAGCTATGACGTAAAATCAAGTCCACCRCG-3'

212 Primers were a generous gift from the DNA Learning Center, Harlem, NY. PCR reactions were  
213 performed using GE illustra PURETaq Ready-To-Go PCR beads, 25µL of PCR reaction, 2µL of  
214 template DNA, and 11.5µL of primers. Reactions were run for 50 cycles: 30 seconds  
215 denaturation at 94°C, 45 seconds annealing at 54°C, and 45 seconds extending 72°C using  
216 Techne Genius Thermal Cycler. PCR amplicons were visualized on a 2% agarose gel using  
217 pBR322/BstNI molecular weight standards to ensure that products were the predicted size. PCR  
218 products were sent to Genewiz Inc. for sequencing. Sequences were aligned using Nucleotide  
219 BLAST. Percent similarity was ascertained using the CLUSTAL W (Thompson et al., 1994; Ni  
220 et al., 2012).

221

### 222 *2.8 Statistical analysis*

223 All water analysis data are presented as mean ± SD.  $p < 0.0001$  for dissolved oxygen  
224 concentrations,  $p=0.0063$  for pH values. Error bars and error ranges display ± S.E.M. as in Table  
225 1 and Figure 2 respectively. P-values were determined through unpaired t-tests for statistical  
226 comparisons of two discrete populations as in Table 1. ANOVA tests for statistical comparisons  
227 of more than two experimental groups and/or discrete populations were performed as in Figure 2.  
228 P-values less than or equal to 0.05 are assumed to display statistical significance.

229

## 230 **3- Results**

231  
232 *3.1 Water analyses*  
233 Over a 9-year survey of the waters in the Bronx River estuary versus its less impacted  
234 counterpart in Greenwich Cove estuary, we collected physicochemical data regarding pH,  
235 temperature and dissolved oxygen levels. As shown in Table 1, the temperature and pH of the  
236 two sites are comparable. Temperature and pH for Bronx River estuary are  $21.93 \pm 1.05$  °C and  
237  $7.28 \pm 0.05$ , while Greenwich Cove estuary are  $24.62 \pm 0.807$  °C and  $7.89 \pm 0.024$ . However,  
238 dissolved oxygen concentrations at the two sites consistently vary widely, with the Bronx River  
239 estuary at  $5.89 \pm 0.30$  mg/L and Greenwich Cove estuary at  $9.69 \pm 2.2$  mg/L. This difference is  
240 statistically significant ( $p < 0.0001$ ). The National Oceanic and Atmospheric Administration  
241 (NOAA) National Estuarine Eutrophication Survey classifies water quality falling between 2 and  
242 5 mg/L dissolved oxygen as stressed (Bricker et al., 1999). These data indicate that organisms  
243 residing in the Bronx River estuary are exposed to chronic, low oxygen levels, a condition that  
244 induces stress and metabolic dysfunction (Halem, et al., 2014; Ravaschiere et al., 2017).

| Site           | Dissolved O <sub>2</sub> (mg/L) | Temperature (°C) | pH              |
|----------------|---------------------------------|------------------|-----------------|
| Bronx River    | $5.59 \pm .302$                 | $21.93 \pm 1.05$ | $7.28 \pm 0.05$ |
| Greenwich Cove | $9.10 \pm .492$                 | $24.62 \pm .807$ | $7.89 \pm .024$ |

245  
246 **Table 1. Estuarian water metrics.** Average levels of dissolved oxygen (DO) over a 9-year survey, water  
247 temperature over a 7-year survey, and pH over a 5-year survey of the Bronx River estuary, NY and  
248 Greenwich Cove, CT. All water collections occurred in June and July, around low tide. Data are presented  
249 as mean  $\pm$  SD.  $p < 0.0001$  for dissolved oxygen concentrations,  $p=0.0063$  for pH values.  
250

251 *3.2 Global methylation in response to stress for grasses from the differentially impacts sites*  
252 As shown in Figure 2, acute heat stress, as monitored by heat shock protein levels, results in  
253 inverse global DNA methylation profiles when comparing grasses collected from sites with  
254 distinctly different levels of environmental challenge. Percent global DNA methylation is  
255 increased by heat shock for grasses from the Bronx River estuary but is decreased by heat shock  
256 for Greenwich Cove organisms. These results are statistically significant ( $p$  values  $< 0.05$ ).  
257 Interestingly, Bronx River grasses consistently demonstrate lower baseline global methylation  
258 levels as compared with their Greenwich Cove conspecifics (in Figure 1, compare Bronx and  
259 Greenwich controls).



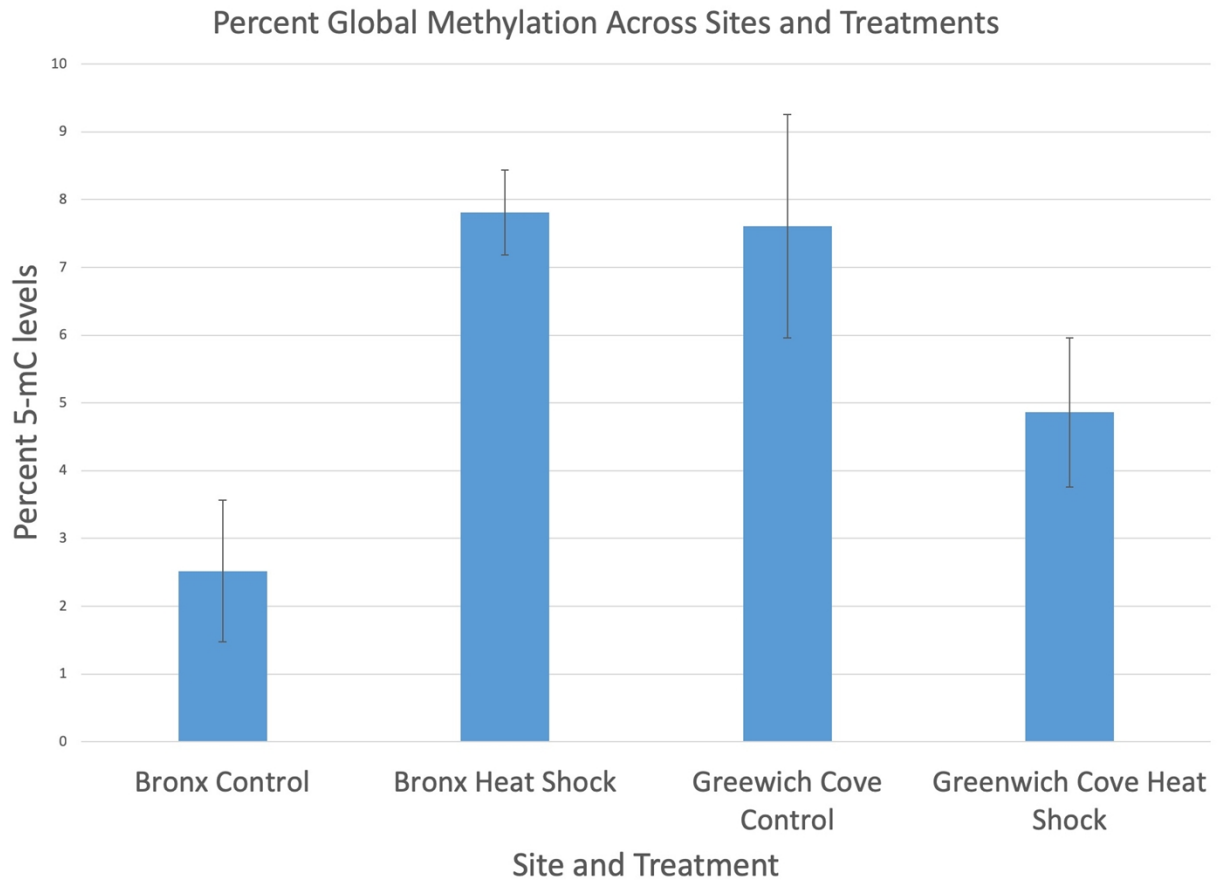

260

261 **Figure 1:** Quantification of global DNA methylation over two years. Average percent 5-methylcytosine  
262 (5-mC) of *S. alterniflorus* from the Bronx River and Greenwich Cove estuaries (n=4 for each group). The  
263 two populations launch inverse methylation responses in acute heat stress. Bronx individuals increase  
264 global methylation ( $p < 0.05$ ), while Greenwich Cove individuals decrease global methylation, ( $p < 0.05$ ).  
265 Statistical results are based on ANOVA tests.

266

### 267 *3.3 HSP70 protein levels indicate acute stress*

268 Western blots analyses of heat shock immuno-reactive proteins bands (HSP70) across two years  
269 (Figure 2) show that heat shock proteins were successfully elicited in controlled laboratory  
270 settings in grasses from both sites.

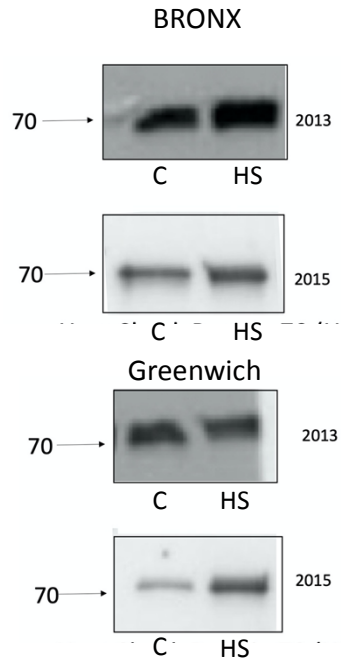

271

272 **Figure 2:** HSP70 Western blot analyses, *S. alterniflorus* (2013 and 2015), collected from Bronx River  
273 Estuary (top) and Greenwich Cove (bottom). Arrows point to 70 kDa HSP70 immunoreactive band. C=  
274 control and HS = heat shocked.

275

### 276 3.4 Barcoding for species identification

277 Among *rbcL* chloroplast DNA gene sequences derived from individuals native to both the Bronx  
278 River and Greenwich Cove, CLUSTAL W alignment revealed negligible heterogeneity (0 - 1%).

279 In addition, CLUSTAL W alignment also showed insignificant (0 - 1%) divergence in *rbcL*

280 sequence within both populations. These results indicate that all specimens used in this study

281 from both sites are members of the same species, either *Sporobolus alterniflorus* or *Sporobolus*

282 *maritimus*. Based on geographical data *Sporobolus maritimus* is not native to the Bronx or

283 Connecticut (USDA, plants database). Thus, we determined that *Sporobolus alterniflorus* is the

284 species we analyzed at both sites, Greenwich Cove and Bronx River estuaries.

285

## 286 4- Discussion

287 Rapid global urbanization and its impact on the environment are fundamentally changing

288 the course of evolution in organisms that represent our urban co-inhabitants (Hendry and

289 Kinnison, 1999; Alberti, 2015; Donihue and Lambert, 2015; Johnson and Munshi-South, 2017).  
290 Plant life is critical to sustainable development of urban ecosystems (Barbier et al., 2011; Mexia  
291 et al., 2018). Thus, an important challenge in ecology is to gain a fuller understanding of the  
292 mechanisms by which plants cope with current unprecedented rates of environmental change.  
293 Information presented here contributes to a growing field of research that documents key  
294 molecular mechanisms by which plants adapt to the challenges of urbanization.

295         Studies that focus specifically on wild populations native to urban landscapes are  
296 especially well suited for predicting and conserving life in urban ecosystems. To date, few  
297 studies employ *in vivo* techniques to analyze the mechanisms of stress tolerance in wild  
298 populations as they respond to urbanization in their native habitats (Thiebaut et al., 2019). For  
299 this study, two distinct wild populations of estuarine grasses were chosen as the biological  
300 models. *Sporobolus alterniflorus* was collected from two sites: the Bronx River, NY and  
301 Greenwich Cove, CT. These estuaries are located along an urban to suburban gradient, that  
302 features differential degrees of urbanization both quantitatively and historically (Rachlin et al.,  
303 2007; Halem et al., 2014; Ravaschiere et al., 2017). Physio-chemical analyses of estuary water,  
304 presented in Table 1, demonstrate that the Bronx River estuary consistently experiences long  
305 term, comparatively low dissolved oxygen, and these results are statistically significant. Hypoxic  
306 conditions in the Bronx River are associated with chronic stress response and metabolic  
307 disruptions in a foundation molluscan species (Halem, et al., 2014; Ravaschiere et al., 2017).  
308 Low dissolved oxygen primarily results from phosphorus and nitrogen run-off associated with  
309 wastewater and urban run-off. In addition, gas exchange in *Sporobolus alterniflorus* relies on  
310 direct access to dissolved oxygen from the aquatic environment via stems and roots that are often  
311 tidally submerged. These submerged parts of the plant, exposed to chronically low dissolved  
312 oxygen, must fulfill respiratory needs for the entire plant (Teal and Kanwisher, 1966). Thus, a  
313 low dissolved oxygen concentration directly inhibits vital metabolic processes and serves as a  
314 predictable indicator for urbanization and contamination.

315         Using estuarine grasses, from two distinct populations as described above, we simulated  
316 an abiotic stressor (heat stress) that is commonly associated with urbanization and climate  
317 change (Schlesinger et al., 2008; Fossog et al., 2013; Simon et al., 2016; Duarte et al., 2017). We  
318 did this by experimentally delivering a controlled heat shock, and monitoring stress response via  
319 immunochemical detection of the reliable stress indicator, heat shock protein 70 (HSP70). After

320 heat shock was applied and induction of heat shock protein was confirmed by Western Blot  
321 analyses, we quantified changing levels of % 5-mC DNA methylation. This allowed us to  
322 monitor epigenetic modification as a response to acute stress in two differentially impacted plant  
323 populations. Figure 1 demonstrates that the Bronx River and Greenwich Cove grasses exhibited  
324 statistically different inverse DNA methylation profiles in response to the controlled application  
325 of acute heat stress. Western Blot analyses (Figure 2) confirm heat stress as indicated by the  
326 predicted and significant increases in heat shock protein (molecular weight 70 kD), and this  
327 response was documented across two years.

328         Results of our global DNA methylation analyses suggest that the two distinct populations  
329 of grasses counter the same heat stress by eliciting DNA methylation profiles that differ  
330 fundamentally and in biologically relevant ways. Our results show that grasses from the Bronx  
331 River estuary counter an acute stress via DNA hyper-methylation. Further studies are necessary  
332 to confirm our speculation that hyper-methylation may be an essential metabolic trade-off that  
333 globally shuts down gene expression, sparing only the basic housekeeping functions that are  
334 necessary for survival during acute stress. Whereas, for grasses native to the less impacted  
335 Greenwich Cove, application of acute stress elicits a reverse pattern, a hypo-methylation of the  
336 genome that may facilitate expression of those loci required for a successful acute stress  
337 response. In support of our findings, multiple recent studies demonstrate that individual plant  
338 populations counter similar environmental stressors in different ways, and this may be controlled  
339 at the epigenetic level (Saez- Laguna et al., 2014; Thiebaut et al., 2019; Rehman and Tanti,  
340 2020).

341         The inverse epigenetic profiling that we report here between Bronx and Greenwich Cove  
342 grasses do not result from speciation. Our barcoding results demonstrate that grasses collected  
343 from these two geographically distinct populations have negligible differences in chloroplast  
344 *rbcL* gene sequence (Kress and Erikson, 2007). Very low rate of sequence divergence (1% or  
345 less) between individuals from the Bronx River and Greenwich Cove estuaries indicates that  
346 these individuals belong to the same species and are thus genetically identical. Differential DNA  
347 methylation within a species is now recognized as a critical indicator of short-term ecological  
348 experience (Rey et al., 2020). This notion of “ecological populations” will become essential in  
349 conservation biology with the recognition that epigenetics offers a key link between  
350 environmental change and phenotypic plasticity in wild populations (Rey et al., 2020).

351           Enhanced tolerance to stress could provide an evolutionary advantage for Bronx River  
352 grasses when confronted with the unpredictable challenges inherent to their native habitat. A  
353 phenomenon called defense priming conditions plants to better tolerate abiotic stressors, and this  
354 constitutes an important evolutionary benefit (Matinez-Medina et al., 2011; Crisp et al., 2016).  
355 This switch-like and reversible process offers sufficient genomic flexibility for sessile organisms,  
356 like plants, to respond rapidly to fluctuating environmental challenges (Meyer, 2008; Boyko and  
357 Kovalchuk, 2011; Arikan et al., 2018). Evidence suggests that defense priming improves fitness  
358 (Conrath et al., 2006; Matinez-Medina et al., 2011), and is regulated by epigenetic modification  
359 (Luna et al., 2012). In defense priming, a “stimulus” targets individual loci such that their  
360 methylation states become altered. This affects future accessibility of transcriptional machinery  
361 and gene expression eliciting a rapid and sustained response upon a later “triggering stimulus”.  
362 We hypothesize that long term hypoxia, as well as potential additional environmental challenges  
363 at the urbanized Bronx River estuary, constitute the priming “stimulus” for this particular  
364 population of grasses. Chromatin restructuring, specifically changes to DNA methylation  
365 patterns, is a mechanism by which plants engage in defense priming (Conrath et al., 2015;  
366 Savvides et al., 2016; Pastor et al., 2013), and here we demonstrate that two distinct plant  
367 populations deploy inverse patterns of global DNA methylation when encountering the same  
368 acute stressor. These results suggest that grasses from the Bronx River Estuary may be engaged  
369 in defense priming. Our research contributes to rapidly growing body of evidence demonstrating  
370 that successful strategies for coping with rapid environmental change do not rely solely on  
371 random heritable changes in DNA sequence. For sessile species such as plants, critical  
372 evolutionary adaptations are propelled by epigenetic change (Youngson et al., 2008; Holeski et  
373 al., 2012; Robertson et al., 2017; Thiebaut et al., 2019; Whittle et al., 2019; Rey et al., 2020).

374           In conclusion, current predictions regarding species tolerance to urbanization and climate  
375 change are based on the assumption that all members of a species elicit the same, or similar  
376 responses to an environmental stressor (Sih et al., 2011). However, data presented here  
377 corroborate growing evidence suggesting that populations separated geographically or by  
378 differential stressors indeed demonstrate key distinct coping mechanisms (Fossog et al., 2013;  
379 Halem et al., 2014; Ravaschiere et al., 2017; De Almeida Duarte et al., 2017). In other words,  
380 members of the same species may utilize diverging mechanisms in order to continue to thrive in  
381 the face of rapid and challenging environmental stressors. In addition, results presented here

382 suggest that stress priming by epigenetic modification may enhance fitness in grasses native to  
383 the heavily impacted Bronx River estuary. These complex molecular mechanisms of biological  
384 adaptation deserve our attention so that we may better understand the ways in which particular  
385 populations develop unique adaptive responses that are specifically suited to unique ecological  
386 challenges.

387 As molecular ecologists and evolutionary biologists, we must accept the notion that  
388 environmentally induced adaptation is a key feature to sustaining resilience and biodiversity in  
389 rapidly expanding urban areas. As conservationists and urban planners, we must gain better  
390 understandings of the unique epigenetic mechanisms by which foundational, ecological service  
391 providers adapt and evolve to tolerate the pressures of urbanization. Future studies are required  
392 in order to identify genes that are differentially methylated in response to stress in *Sporobolus*  
393 *alterniflorus*, a species that is vital to urban sustainability. These studies await the full sequence  
394 analysis and annotation of the *Sporobolus alterniflorus* genome. In addition, future studies  
395 should be initiated to more fully understand the intricacies of adaptation in populations that  
396 remain chronically exposed to low oxygen and other stressors associated with urbanization.  
397

## 398 **References**

399 Al-Whaibi, MH. Plant heat-shock proteins: a mini review. *Journal of King Saud University-*  
400 *Science*. 2011;23 (2): 139-150.

401 Alberti, M. Eco-evolutionary dynamics in an urbanizing planet. *Trends Ecol Evol*. 2015;30 (2):  
402 114-126.

403 Anaraki ZE, Tafreshi SAH, Shariati M. Transient silencing of heat shock proteins showed  
404 remarkable roles for HSP70 during adaptation to stress in plants. *Environmental and*  
405 *Experimental Botany*. 2018;155: 142-157.

406 Angelos E, Ruberti C, Kim S-J, and Brandizzi F. Maintaining the factory: The roles of the  
407 unfolded protein response in cellular homeostasis in plants. *Plant Journal*. 2016;90 (4): 671-  
408 682.

409 Arikan B, Özden S, Turgut-Kara N. DNA methylation related gene expression and  
410 morphophysiological response to abiotic stresses in *Arabidopsis thaliana*. *Environmental and*  
411 *Experimental Botany*. 2018;149: 17-26.

- 412 Arnholdt-Schmitt B. Stress-induced cell reprogramming. A role for global genome regulation?  
413 Plant Physiology. 2004;136 (1): 2579-2586.
- 414 Astarai-Imani M, Kapelan Z, Fu G, Butler D. Assessing the combined effects of urbanisation  
415 and climate change on the river water quality in an integrated urban wastewater system in the  
416 UK. J. Environ Manage. 2012;112: 1-9.
- 417 Barbier EB, Hacker S, Kennedy C, Koch E, Stier A, Silliman B. The value of estuarine and  
418 coastal ecosystem services. Ecological Society of America. Ecological Monographs. 2011;81  
419 (2): 169-193.
- 420 Bernes S, Siman-Tov R, Ankri S. Epigenetic and classical activation of *Entamoeba histolytica*  
421 heat shock protein 100 (EHSP100) expression. FEBS Letters. 2005;579 (28): 6395-6402.
- 422 Bond DM, Baulcombe DC. Small RNAs and heritable epigenetic variation in plants. Trends in  
423 Cell Biology. 2014;24 (2): 100-107.
- 424 Bossdorf O, Arcuri D, Richards C.L, Pigliucci M. Experimental alteration of DNA methylation  
425 affects the phenotypic plasticity of ecologically relevant traits in *Arabidopsis thaliana*. Evol.  
426 Ecol. 2010;24: 541–553.
- 427 Boyko A, Kovalchuk I. Genome instability and epigenetic modification - heritable responses to  
428 environmental stress. Current Opinion in Plant Biology. 2011;14: 260-266.
- 429 Bozaykut P, Ozer NK, Karademir B. Regulation of protein turnover by heat shock proteins. Free  
430 Radical Biology and Medicine. 2014;77: 195-209.
- 431 Bricker S, Clement C, Pirhalla D, Orlando S, Farrow D. National Estuarine Eutrophication  
432 Assessment. Effect of Nutrient Enrichment in the Nation's Estuaries. U.S. Department of  
433 Commerce, National Oceanic and Atmospheric Administration. 1999.
- 434 Chin A, O'Dowd AP, Gregory KJ. Urbanization and River Channels. Treatise on  
435 Geomorphology. Fluvial Geomorphology, San Diego: Academic Press. 2013;9: 809-827.
- 436 Chmura GL, Anisfeld SC, Cahoon DR, Lynch JC. Global carbon sequestration in tidal, saline  
437 wetland soils. Advancing Earth and Space Science. Global Biogeochemical Cycles. 2003;17 (4):  
438 22(1-12).
- 439 Conrath U, Beckers GJ, Flors V, Garcia-Augustin P, Jakab G, Mauch F, et al. Priming: getting  
440 ready for battle. Mol. Plant Microbe Interact. 2006;19 (10): 1062-1071.
- 441 Conrath U, Beckers GJM, Langenbach CJG, Jaskiewicz MR. Priming for enhanced defense.  
442 Annual Review of Phytopathology. 2015;53: 97-119.

- 443 Courrat A, Lobry J, Nicolas D, Laffargue P, Amara R, Lepage M, et al. Anthropogenic  
444 disturbance on nursery function of estuarine areas for marine species. *Estuar Coast Shelf*  
445 *Science*. 2009;81: 179-190.
- 446 Crimmens T, Larson M. Bronx River Alliance: Ecological Restoration and Management Plan.  
447 2006. Available from: [https://www.nycgovparks.org/download/bronx-river-ecological-](https://www.nycgovparks.org/download/bronx-river-ecological-restoration-and-management-plan-2006.pdf)  
448 [restoration-and-management-plan-2006.pdf](https://www.nycgovparks.org/download/bronx-river-ecological-restoration-and-management-plan-2006.pdf)
- 449 Crisp PA, Ganguly D, Eichten SR, Borevitz J, Pogson BJ. Reconsidering plant memory:  
450 Intersections between stress recovery, RNA turnover, and epigenetics. *Science Advances*. 2016;2  
451 e1501340: 1-14.
- 452 De Almeida Duarte LF, de Souza CA, Pereira CDS, Pinheiro MAA. Metal toxicity assessment  
453 by sentinel species of mangroves: In situ case study integrating chemical and biomarkers  
454 analyses. *Ecotoxicology and Environmental Safety*. 2017;145: 367-376.
- 455 De Jong L, Moreau X, Thiéry A. Expression of heat shock proteins as biomarker tool in aquatic  
456 invertebrates: actual knowledge and ongoing developments for the early detection of  
457 environmental changes and ecological risks. *Heat-Shock Proteins: International Research*. F.  
458 Columbus (Ed), Nova Science Publishers. 2008;20: 375-392.
- 459 Donihue MC, Lambert MR. Adaptive evolution in urban ecosystems. *AMBIO*. 2015;44: 194-  
460 203.
- 461 Duarte IA, Reis-Santos P, França S, Cabral H, Fonseca VF. Biomarker responses to  
462 environmental contamination in estuaries: A comparative multi-taxa approach. *Aquatic*  
463 *Toxicology*. 2017;189: 31-41.
- 464 Feder ME, Hofmann GE. Heat-shock proteins, molecular chaperones, and the stress response:  
465 evolutionary and ecological physiology. *Annual Review of Physiology*. 1999;61 (1): 243-282.
- 466 Fernández-Fernández MR, Gragera M, Ochoa-Ibarrola L, Quintana-Gallardo L, Valpuesta JM.  
467 HSP70 - a master regulator in protein degradation. *FEBS Lett*. 2017;591(17): 2648–60.
- 468 Fossog BT, Antonio-Nkondjio C, Kengne P, Njiokou F, Besansky NJ, Costantini C.  
469 Physiological correlates of ecological divergence along an urbanization gradient: differential  
470 tolerance to ammonia among molecular forms of the malaria mosquito *Anopheles gambiae*.  
471 *BMC Ecology*. 2013;13: 1.
- 472 França S, Vasconcelos RP, Reis-antos P, Fonseca VF, Costa MJ, Cabral H. Vulnerability of  
473 Portuguese estuarine habitats to human impacts and relationship with structural and functional  
474 properties of the fish community. *Ecological Indicators*. 2012;18: 11-19.
- 475 Galimay E, Wikfors G, Dixon M, Newell C, Meseck S, Hennings D, et al. Cultivation of the  
476 ribbed mussel (*Geukensia demissa*) for nutrient bioextraction in an urban estuary. *Environ Sci*  
477 *Technol*. 2017;51 (22): 13311-13318.



- 478 Gao WW, Xiao RQ, Peng BL, Xu HT, Shen HF, Huang MF, et al. Arginine methylation of  
479 HSP70 regulates retinoid acid-mediated *RARbeta2* gene activation. Proc. Natl. Acad. Sci. USA,  
480 2015;112 (26): E3327-36.
- 481 Gedan KB, Bertness MD. Experimental warming causes rapid loss of plant diversity in New  
482 England salt marshes. Ecology Letters. 2009;12 (8): 842-848.
- 483 Gedan KB, Bertness MD. How will warming affect the salt marsh foundation species *Spartina*  
484 *patens* and its ecological role? Oecologia. 2010;164 (2): 479-487.
- 485 Gu X, Sun J, Li S, Wu X, Li L. Oxidative stress induces DNA demethylation and histone  
486 acetylation in SH-SY5Y cells: potential epigenetic mechanisms in gene transcription in A $\beta$   
487 production. Neurobiology of Aging. 2013;34 (4): 1069-1079.
- 488 Guy CL, Li QB. The organization and evolution of the spinach stress 70 molecular chaperone  
489 gene family. The Plant Cell. 1998;10 (4): 539-556.
- 490 Halem ZM, Ross DJ, Cox RL. Evidence for intraspecific endocrine disruption of *Geukensia*  
491 *demissa* (Atlantic ribbed mussel) in an urban watershed. Comparative Biochemistry and  
492 Physiology Part A: Molecular & Integrative Physiology. 2014;175: 1-6.
- 493 Hasanuzzaman M, Nahar K, Alam M, Roychowdhury R, Fujita M, Physiological, biochemical,  
494 and molecular mechanisms of heat stress tolerance in plants. International Journal of Molecular  
495 Sciences. 2013;14 (5): 9643-9684.
- 496 Hasanuzzaman M, Nahar K, Fujita M. Plant response to salt stress and role of exogenous  
497 protectants to mitigate salt-induced damages. Ecophysiology and responses of plants under salt  
498 stress. Springer. 2013; 25-87.
- 499 Hauser MT, Aufsatz W, Jonak C, Luschnig C. Transgenerational epigenetic inheritance in plants.  
500 Biochim. Biophys. Acta. 2011;1809 (8): 459-468.
- 501 He Y, Li Z. Epigenetic Environmental Memories in Plants: Establishment, Maintenance, and  
502 Reprogramming. Trends in Genetics. 2018;34 (11): 856-866.
- 503 Hendershot LM. The ER function BiP is a master regulator of ER function. Mt Sinai J. Med.  
504 2004;71 (5): 289-297.
- 505 Hendrick JP, Hartl FU. The role of molecular chaperones in protein folding. FASEB J. 1995;9  
506 (15): 1559-1569.
- 507 Hendry AP, Kinnison MT. The pace of modern life: measuring rates of contemporary  
508 microevolution. Evolution. 1999;53: 1637-1653.
- 509 Holeski LM, Jander G, Agrawal AA. Transgenerational defense induction and epigenetic  
510 inheritance in plants. Trends in Ecology and Evolution. 2012;27 (11): 1-9.

- 511 Johnson MT, Munshi-South J. Evolution of life in urban environments. *Science*. 2017;358  
512 (6363): Eaam8327.
- 513 Jones C, Lawton J, Shachak M. Positive and negative effects of organisms as physical ecosystem  
514 engineers. *Ecology*. 1997;78: 1946-1957.
- 515 Kovalchuk I, Abramov V, Pogribny I, Kovalchuk O. Molecular aspects of plant adaptation to life  
516 in the Chernobyl zone. *Plant Physiology*. 2004;135: 357-363.
- 517 Kress W, Erikson D. A two-locus global DNA barcode for land plants: the coding *rbcL* gene  
518 complements the non-coding *trnH-psbA* spacer region. *PLoS One*. 2007;2(6): e508.
- 519 Lämke J, Bäurle I. Epigenetic and chromatin-based mechanisms in environmental stress  
520 adaptation and stress memory in plants. *Genome biology*. 2017;18 (1): 124.
- 521 Leborgne-Castel N, Jelitto-Van Dooren EP, Frofts AJ, Denecke J. Overexpression of BiP in  
522 tobacco alleviates endoplasmic reticulum stress. *Plant Cell*. 1999;11 (3): 459–470.
- 523 Limburg KE, Stainbrook KM. Urbanization consequences: Case studies in the Hudson River  
524 watershed. *American Fisheries Society Symposium*. 2005;23-37.
- 525 Litten S, Fowler B, Gauthier M, Bloom N. Contaminant Assessment and Reduction Project  
526 (CARP): Toxic Chemicals in New York Harbor and Vicinity - Sources and Ambient  
527 Concentrations of Pesticides, PAHs, Mercury, and Cadmium. 2007. Available from:  
528 [http://www.dec.ny.gov/docs/water\\_pdf/organicmetalposter.pdf](http://www.dec.ny.gov/docs/water_pdf/organicmetalposter.pdf)
- 529 Lira-Medeiros CF, Parisod C, Fernandes RA, Mata CS, Cardoso MA, Ferreira PCG. Epigenetic  
530 variation in mangrove plants occurring in contrasting natural environments, *PLoS One*. 2010;5  
531 (4): 10326.
- 532 Liu D, Zhang X, Cheng Y, Takano T, Liu S. rHSP90 gene expression in response to several  
533 environmental stresses in rice (*Oryza sativa* L.). *Plant Physiol. Biochem*. 2006;44 (5): 380–386.
- 534 Lotze HK, Lenihan HS, Bourque B, Bradbury RH. Depletion, Degradation, and Recovery  
535 Potential of Estuaries and Coastal Seas. *Science*. 2006;312 (5781): 1806-1809.
- 536 Luna E, Bruce TJA, Roberts MR, Flors V, Ton J. Next-generation systemic acquired resistance.  
537 *Plant Physiol*. 2012;158: 844–853.
- 538 Martinez-Medina A, Flors V, Heil M, Mauch-Mani B, Pieterse C, Pozo MJ, et al. Recognizing  
539 Plant Defense Priming. *Trends in Plant Science*. 2016;21 (10): 818-822.
- 540 McFarlin CR, Bishop TD, Hester MW, Alber M. Context-dependent effects of the loss of  
541 *Spartina alterniflora* on salt marsh invertebrate communities. *Estuarine, Coastal and Shelf*  
542 *Science*. 2015;163 (Part B): 218-230.

- 543 Mexia T, Vieira J, Principe A, Anjos A, Silva P, Lopes N, et al. Ecosystem services: Urban parks  
544 under a magnifying glass. *Environmental Research*. 2018;160: 469-478.
- 545 Molinier J, Ries G, Zipfel C, Hohn B. Transgeneration memory of stress in plants. *Nature*.  
546 2006;442 (7106): 1046–1049.
- 547 Negi P, Rai AN, Suprasanna P. Moving through the Stressed Genome: Emerging Regulatory  
548 Roles for Transposons in Plant Stress Response. *Frontiers in Plant Science*. Plant Genetics and  
549 Genomics, Plant Translational Research in the Genomics Era. 2016;7 (1448): 1-20.
- 550 Nelson K, Palmer M, Pizzuto J, Moglem G, Angermeier P, Hilderbrand R, et al. Forecasting the  
551 combined effects of urbanization and climate change on stream ecosystems: from impacts to  
552 management options. *J. Applied Ecology*. 2009;46: 154-163.
- 553 Noh SJ, Kwon CS, Oh DH, Moon JS, Chung WI. Expression of an evolutionarily distinct novel  
554 BiP gene during the unfolded protein response in *Arabidopsis thaliana*. Elsevier. *Gene*. 2003;  
555 81-91.
- 556 Nover L, Scharf KD, Gagliardi D, Vergne P, Czarnecka-Verner E, Gurley WB. The Hsf world:  
557 classification and properties of plant heat stress transcription factors. *Cell Stress Chaperones*.  
558 1996;1 (4): 215-223.
- 559 Pastor V, Diez EL, Mauch-Mani B, Ton J. Primed plants do not forget. *Environ. Exp. Bot.*  
560 2013;94: 46–56.
- 561 Popova OV, Dinh HQ, Aufsatz W, Jonak C. The RdDM pathway is required for basal heat  
562 tolerance in arabidopsis. *Molecular Plant*. 2013;6 (2): 396-410.
- 563 Peterson PM, Romaschenko K, Arrieta YH, Saarela JM. (2332) Proposal to conserve the name  
564 *Sporobolus* against *Spartina*, *Crypsis*, *Poncelletia*, and *Heleochoa* (*Poaceae: Chloridoideae:*  
565 *Sporobolinae*). *TAXON*. 2014;63 (6): 1373-1374.
- 566 Rachlin JW, Warkentine BE, Pappantoniou A. An Evaluation of the Ichthyofauna of the Bronx  
567 River, a Resilient Urban Waterway. Albany, NY: *Northeastern Naturalist*. 2007;14: 531-544.
- 568 Ravaschiere A, Cutler C, Edleson K, Halem Z, Magun H, Meckler F, et al. Quantification of  
569 Heat Shock Protein 70 and Acetylcholinesterase Over a Time Course Suggests Environmental  
570 Adaptation in a Foundational Molluscan Species. *Ecotoxicology and Environmental Safety*.  
571 2017;142: 222-229.
- 572 Redfield A. Development of a New England salt marsh. *Ecol. Monograph*. 1972;42: 201-237.
- 573 Rehman, Tanti. Understanding epigenetic modifications in response to abiotic stresses in plants.  
574 *Biocatalysis and Agricultural Biotechnology*. 2020;27: 101673.

- 575 Rejeb IB, Pastor V, Mauch-Mani B. Plant responses to simultaneous biotic and abiotic stress:  
576 molecular mechanisms. *Plants*. 2014;3 (4): 458-475.
- 577 Rey O, Danchin E, Mirouze M, Loot C, Blanchet S. Adaptation to Global Change: a transposable  
578 element – epigeneticsperspective. *Trends in Ecology and Evolution*. 2016;31 (7): 514-526.
- 579 Rey O, Eizaguirre C, Angers B, Baltazar-Soares M, Sagonas K, Prunier J, et al. Linking  
580 epigenetics and biological conservation: Toward a *conservation epigenetics* perspective.  
581 *Functional Ecology*. 2020;34: 414-427.
- 582 Robertson M, Schrey A, Moss CJ, Richards C. Genetic and epigenetic variation in *Spartina*  
583 *alterniflora* following the *Deepwater Horizon* oil spill. *Evol. Applications*. 2017;1-10: 792-801.
- 584 Saez-Laguna E, Guevara MA, Diaz LM, Sanchez-Gomez D, Collada C, Aranda I, et al.  
585 Epigenetic Variability in the Genetically Uniform Forest Tree Species *Pinus pinea* L. *PLoS One*.  
586 2014;9 (8): e103145.
- 587 Sanders BM, Hope C, Pascoe VM, Martin LS. Characterization of the stress protein response in  
588 two species of *Collisella* limpets with different temperature tolerances. *Physiological Zoology*.  
589 1991; 1471-1489.
- 590 Savvides A, Ali S, Tester M, Fotopoulos V. Chemical priming of plants against multiple abiotic  
591 stresses: mission possible? *Trends in Plant Science*. 2016;21 (4): 329-340.
- 592 Seto KC, Sánchez-Rodríguez R, Fragkias M. The new geography of contemporary urbanization  
593 and the environment. *Annual Review of Environment and Resources*. 2010;35: 167-194.
- 594 Scarpaci TE, Zanol MI, Valle EM. Investigating the role of plant heat shock proteins during  
595 oxidative stress. *Plant Signaling & Behavior*. 2008;3 (10): 856-857.
- 596 Schlesinger MD, Manley PN, Holyoak M. Distinguishing stressors acting on land bird  
597 communities in an urbanizing environment. *Ecology*. 2008;89 (8): 2302–2314.
- 598 Schlesinger MJ. Heat shock proteins. *J. Biol Chem*. 1990;265 (21): 12111-12114.
- 599 Schröder M, Kaufman RJ. ER stress and the unfolded protein response. *Mutation*  
600 *Research/Fundamental and Molecular Mechanisms of Mutagenesis*. 2005;569 (1-2): 29-63.
- 601 Sih, Ferrari, Harris. Evolution and behavioural responses to human-induced rapid environmental  
602 change. *Evolutionary Applications*. 2011;4(2): 367–387.
- 603 Shibahara T, Kawasaki H, Hirano H. Identification of the 19S regulatory particle subunits from  
604 the rice 26S proteasome. *FEBS Journal*. 2002;269 (5): 1474-1483.

- 605 Simon E, Harangi D, Baranyai E, Braun M, Fábíán I, Mizser S, et al. Distribution of toxic  
606 elements between biotic and abiotic components of terrestrial ecosystem along an urbanization  
607 gradient: Soil, leaf litter and ground beetles. *Ecological Indicators*. 2016;60: 258-264.
- 608 Slattery HR. Urbanization: impact on dissolved oxygen and sedimentation in the hart brook  
609 watershed (Lewiston, Maine). Honors Theses 2018; 243. Available from:  
610 <https://scarab.bates.edu/honorstheses/243/>
- 611 Smirnoff N. Plant resistance to environmental stress. *Curr. Opin. Biotechnol.* 1998;9 (2): 214-  
612 219.
- 613 Sung DY, Kaplan F, Guy CL. Plant HSP70 molecular chaperones: protein structure, gene family,  
614 expression and function. *Physiologia Plantarum*. 2002;113 (4): 443-451.
- 615 Teal J, Kanwisher J. Gas transport in the marsh grass, *Spartina alterniflora*. *J. Experimental*  
616 *Botany*. 1966;17(51): 355-361.
- 617 Tedeschi JN, Kennington WJ, Berry O, Whiting S, Meekan M, Mitchell NJ. Increased  
618 expression of HSP70 and HSP90 mRNA as biomarkers of thermal stress in loggerhead turtle  
619 embryos (*Caretta Caretta*). *J. Therm. Biol.* 2015;47: 42-50.
- 620 Thompson JD, Higgins DG, Gibson TJ. CLUSTAL W: improving the sensitivity of progressive  
621 multiple sequence alignment through sequence weighting, position-specific gap penalties and  
622 weight matrix choice. *Nucleic Acids Res.* 1994;11 22(22): 4673-4680.
- 623 Thiebaut F, Hemerly AS, Ferreira PCG. A Role for Epigenetic Regulation in the Adaptation and  
624 Stress Responses of Non-model Plants. *Front. Plant Sci.* 2019;10 (246): 1-7.
- 625 Van Dolah RF, Riekerk GH, Bergquist DC, Felber J, Chestnut DE, Holland AF. Estuarine  
626 habitat quality reflects urbanization at large spatial scales in South Carolina's coastal zone. *Sci.*  
627 *Total Environ.* 2008;390 (1): 142-154.
- 628 Van Loon-Steensma JM, Vellinga P. Trade-offs between biodiversity and flood protection  
629 services of coastal salt marshes. *Current Opinion in Environmental Sustainability.* 2013;5 (3-4):  
630 320-326.
- 631 Walter P, Ron D. The unfolded protein response: from stress pathway to homeostatic regulation.  
632 *Science*. 2011;334 (6059): 1081-1086.
- 633 Wang C, Gu X, Wang X, Guo H, Geng J, Yu H, et al. Stress response and potential biomarkers  
634 in spinach (*Spinacia oleracea* L.) seedlings exposed to soil lead. *Ecotoxicol. Environ. Saf.*  
635 2011;74 (1): 41-47.
- 636 Wang J, Pant HK. Enzymatic hydrolysis of organic phosphorus in river bed sediments.  
637 *Ecological Engineering*. 2010;36 (7): 963-968.

- 638 Wang W, Vinocour B, Shoseyov O, Altman A. Role of plant heat-shock proteins and molecular  
639 chaperones in the abiotic stress response. *Trends in Plant Science*. 2004;9 (5): 244-252.
- 640 Wang WS, Pan YJ, Zhao XQ, Dwivedi D, Zhu LH, Ali J, et al. Drought-induced site-specific  
641 DNA methylation and its association with drought tolerance in rice (*Oryza sativa* L.). *J. Exp.*  
642 *Bot.* 2011;62 (6): 1951-1960.
- 643 Wang WX, Vinocur B, Altman A. Plant responses to drought, salinity and extreme temperatures:  
644 towards genetic engineering for stress tolerance. *Planta*. 2003;218 (1): 1–14.
- 645 Wang Y, Reiter RJ, Chan Z. Phyto melatonin: a universal abiotic stress regulator. *J. Exp. Botany*.  
646 2018;69 (5): 963-974.
- 647 Whittle CA, Otto SP, Johnston MO, Krochko JE. Adaptive epigenetic memory of ancestral  
648 temperature regime in *Arabidopsis thaliana*. *Botany*. 2009;87: 650–657.
- 649 United States Department of Agriculture (USDA), Plants Database. Available from:  
650 <https://plants.usda.gov/core/profile?symbol=SPAL> <https://plants.usda.gov/core/profile?symbol=SPMA6>
- 651 Youngson NA, Whitelaw E. Transgenerational epigenetic effects. *Ann. Rev. Genomics Hum.*  
652 *Genet.* 2008;9: 233-257.
- 653
